# Supplementary material for: An alternative CYB5A transcript is expressed in aneuploid ALL and enriched in relapse
Source: PubMed Central journal article supplement (PMC9014596; doi:10.1186/s12863-022-01041-1), 2022-04-18

**A**

**Cellline: Nalm6**  
*pCYB5Aalt* (n=3)  
*pEmpty* (n=2)

**pro-apoptotic**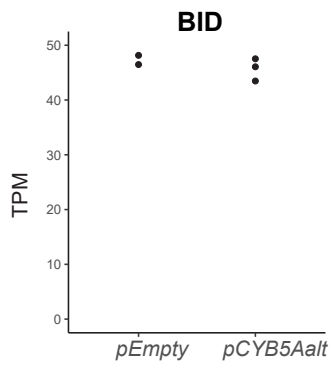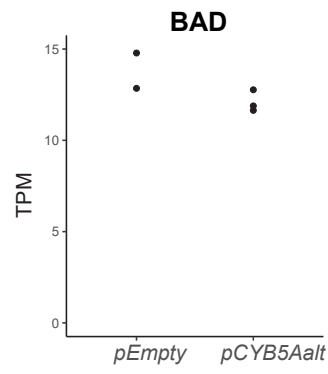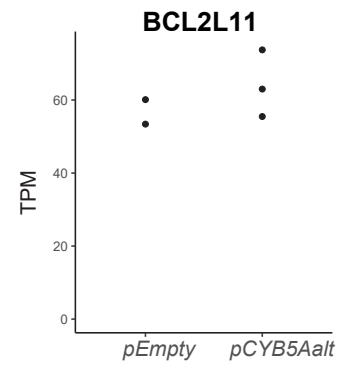**anti-apoptotic**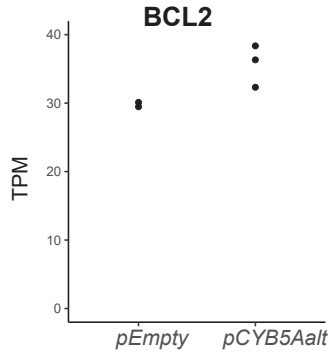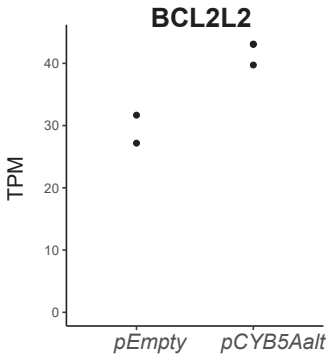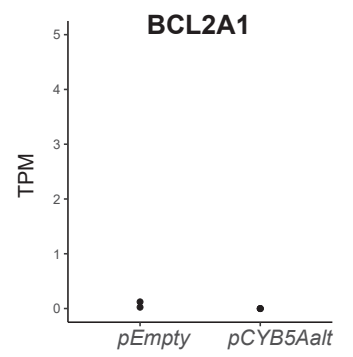**isoform-dependent**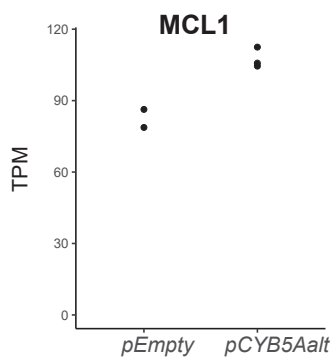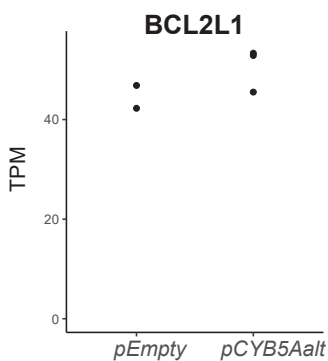**B**

**Cohort 3**  
 (n=220)  
*CYB5Aalt* (n=22)  
*CYB5A WT* (n=198)

**pro-apoptotic**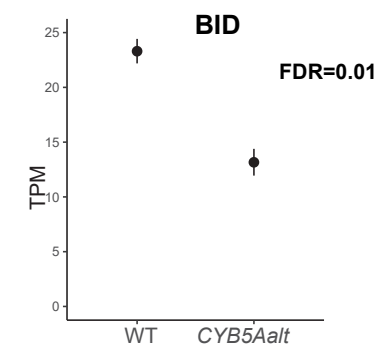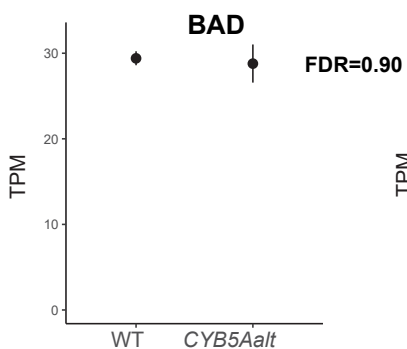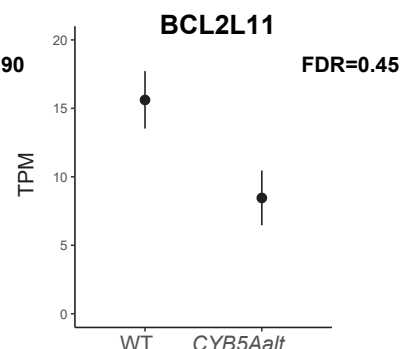**anti-apoptotic**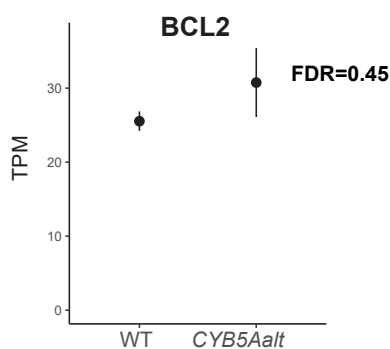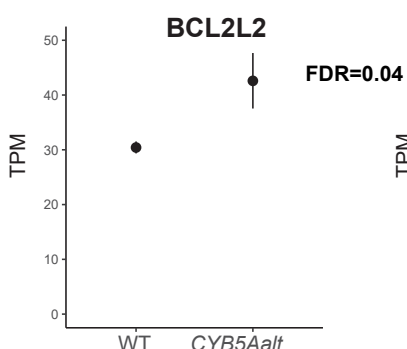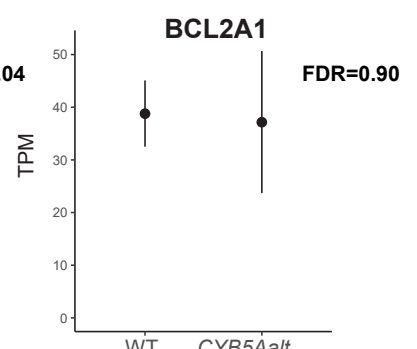**isoform-dependent**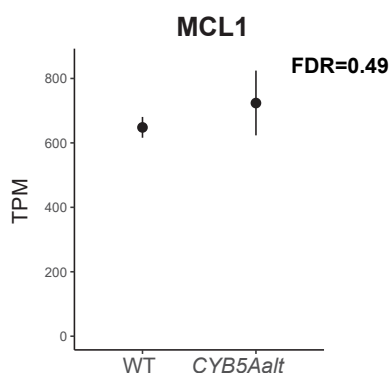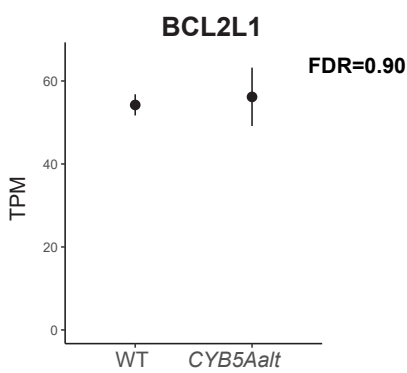

Supplement: 12863_2022_1041_MOESM14_ESM.pdf [file 12863_2022_1041_MOESM14_ESM.pdf]
