# Supplementary material for: An alternative CYB5A transcript is expressed in aneuploid ALL and enriched in relapse
Source: PubMed Central journal article supplement (PMC9014596; doi:10.1186/s12863-022-01041-1), 2022-04-18
Supplement: 12863_2022_1041_MOESM3_ESM.pdf [file 12863_2022_1041_MOESM3_ESM.pdf]

---

## Cohort 1

(samples= 86)

### Patient material

- lack of *BCR-ABL1*, *MLL* rearrangements, *ETV6-RUNX1*
- samples retrieved at initial diagnosis (ID), relapse (REL)
- minimal residual disease (MRD) <0.01 at remission
- 22 adult patients treated according to GMALL treatment protocol
- 25 pediatric patients treated according to BFM/COALL treatment protocol

---

### RNA isolation

- Trizol
- RNA integrity number (RIN) > 7 for sequencing

---

### Sequencing

- Illumina HiSeq4000
- six samples per lane
- sequenced with average of 64 million mapped reads per sampel (MMRS)

---

### Alignment

- GRCh 37.75
- STAR-aligner

---

### Gene fusion detection

- defuse v0.7.0
- FusionCatcher v0.99.7cv beta

---

### Expression quantification

- Stringtie

---

### Differential gene expression

- Limma Voom
- 

## Cohort 2

(samples= 140)

### Patient material

- samples retrieved at ID
- 140 adult patients treated according to GMALL treatment protocol

---

### RNA isolation

- Trizol
- RNA integrity number (RIN) > 7 for sequencing

---

### Sequencing

- Illumina HiSeq4000
- six samples per lane
- sequenced with average of 64 million mapped reads per sampel (MMRS)

---

### Alignment

- GRCh 37.75
- STAR-aligner

---

### Gene fusion detection

- defuse v0.7.0
- FusionCatcher v0.99.

---

### Expression quantification

- Stringtie

---

### Differential gene expression

- Limma Voom
-
