# Supplementary material for: An alternative CYB5A transcript is expressed in aneuploid ALL and enriched in relapse
Source: PubMed Central journal article supplement (PMC9014596; doi:10.1186/s12863-022-01041-1), 2022-04-18

cohort 2 (n=140)

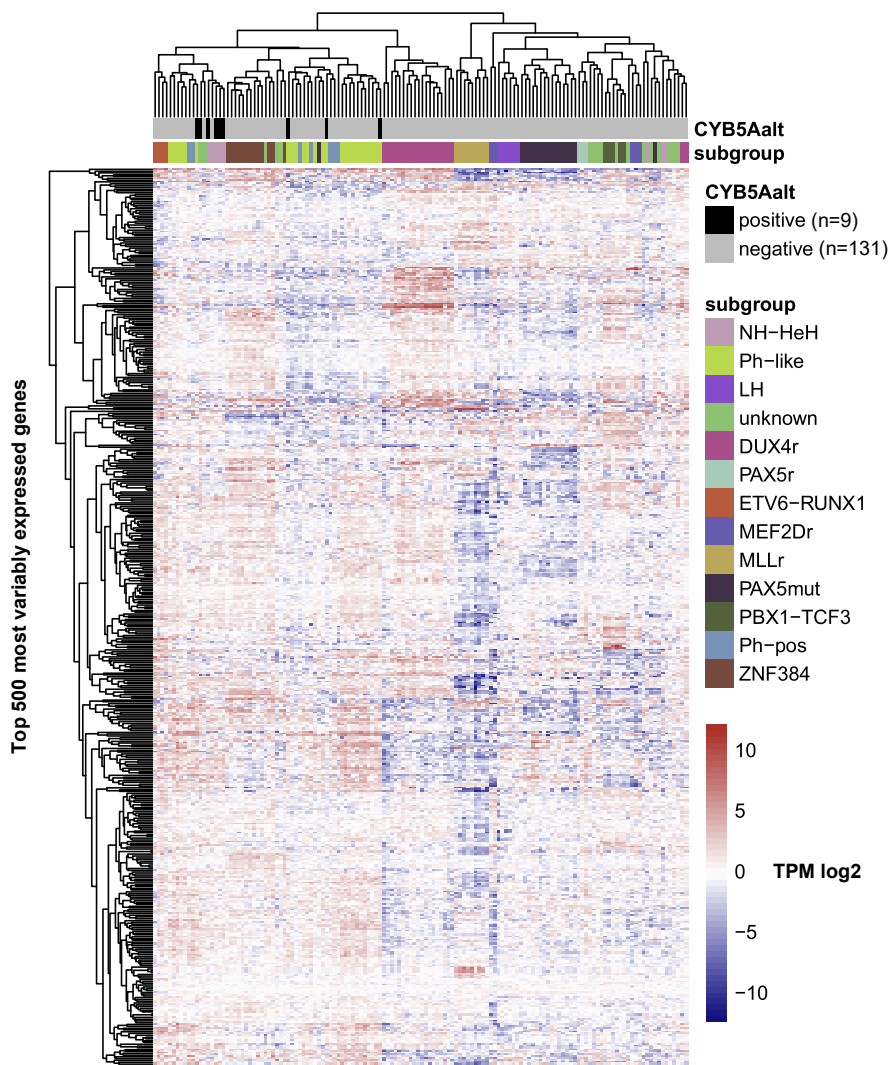

Supplement: 12863_2022_1041_MOESM8_ESM.pdf [file 12863_2022_1041_MOESM8_ESM.pdf]
